# Supplementary material for: Impact of Facial Atrophic Acne Scars on Quality of Life: A Multi-country Population-Based Survey
Source: Springer Nature journal article supplement (doi:10.1007/s40257-021-00628-1), 2021-10-27

## Supplementary Information

### Impact of Facial Atrophic Acne Scars on Quality of Life: A Multi-country Population-based Survey

Jerry Tan<sup>1</sup>, Stefan Beissert<sup>2</sup>, Fran Cook-Bolden<sup>3</sup>, Rajeev Chavda<sup>4</sup>, Julie Harper<sup>5</sup>, Adelaide Hebert<sup>6</sup>, Edward Lain<sup>7</sup>, Alison Layton<sup>8</sup>, Marco Rocha<sup>9</sup>, Jonathan Weiss<sup>10</sup>, Brigitte Dréno<sup>11,\*</sup>

#### Affiliations

<sup>1</sup>Western University Canada, Schulich School of Medicine and Dentistry, 2224 WALKER ROAD, SUITE 300 WINDSOR, ONTARIO N8W 5L7

<sup>2</sup>Department of Dermatology, University Hospital Carl Gustav Carus, TU Dresden, Fetscherstrasse 74, D-01307 Dresden, Germany

<sup>3</sup>Mount Sinai Department of Dermatology, New York, 5 East 98th Street, New York, NY 10029

<sup>4</sup>GALDERMA, Rue d'Entre-deux-Villes 10 - 1814 La Tour-de-Peilz, Switzerland

<sup>5</sup>The Dermatology and Skin Care Center of Birmingham, 2470 Rocky Ridge Rd # 100, Vestavia Hills, AL 35243, USA

<sup>6</sup>The University of Texas Medical School – Houston, 6655 Travis, Suite 980, Houston, TX 77030

<sup>7</sup>Austin Institute for Clinical Research, 1601 E Pflugerville Pkwy Suite 1101, Pflugerville, TX

<sup>8</sup>Hull York Medical School, University Rd, Heslington, York YO10 5DD, UK

<sup>9</sup>Federal University of São Paulo, R. Sena Madureira, 1500 - Vila Clementino, São Paulo - SP, 04021-001, Brazil

<sup>10</sup>Georgia Dermatology Partners, (Formerly, Gwinnett Dermatology, PC), 2383 Pate St., N, Snellville, GA 30078

<sup>11</sup>Unité Thérapie Cellulaire et Génique, Faculté de Médecine de Nantes, CHU Nantes - Place Alexis Ricordeau, 44093 Cedex 01, France

**\*Corresponding author:** Brigitte Dréno; email: [brigitte.dreno@atlanmed.fr](mailto:brigitte.dreno@atlanmed.fr); tel: +33 2 40 08 31 18

**Supplementary Table 1** Patient characteristics

|                             | Total<br>sample | 18 to 24<br>years | 25 to 45<br>years | 46 to 55<br>years | P<br>value* |
|-----------------------------|-----------------|-------------------|-------------------|-------------------|-------------|
| n                           | 723<br>(100%)   | 92<br>(12.7%)     | 519<br>(71.8%)    | 112<br>(15.5%)    |             |
| <b>Demographics</b>         |                 |                   |                   |                   |             |
| Age (year), mean (SEM)      | 35.1<br>(0.64)  | 21.75<br>(0.26)   | 34.15<br>(0.08)   | 50.28<br>(0.24)   |             |
| Sex, n (%)                  |                 |                   |                   |                   | 0.299       |
| Male                        | 350<br>(48.4%)  | 39<br>(42.7%)     | 252<br>(48.5%)    | 59<br>(52.3%)     |             |
| Female                      | 373<br>(51.6%)  | 52<br>(57.3%)     | 267<br>(51.4%)    | 54<br>(47.7%)     |             |
| Country of residence, n (%) |                 |                   |                   |                   | 0.006       |
| USA                         | 258<br>(35.7%)  | 42<br>(45.3%)     | 161<br>(31.1%)    | 55<br>(49.0%)     |             |
| Canada                      | 27<br>(3.7%)    | 3 (3.2%)          | 20<br>(3.8%)      | 4 (3.9%)          |             |
| Brazil                      | 297<br>(41.1%)  | 31<br>(33.8%)     | 244<br>(47.0%)    | 22<br>(19.8%)     |             |
| EU (Germany, France, Italy) | 141<br>(19.5%)  | 16<br>(17.7%)     | 94<br>(18.1%)     | 31<br>(27.2%)     |             |
| Type of residence, n (%)    |                 |                   |                   |                   | 0.002       |
| Urban                       | 477<br>(66.0%)  | 52<br>(57.2%)     | 375<br>(72.4%)    | 49<br>(43.8%)     |             |
| Suburban                    | 178<br>(24.7%)  | 32<br>(34.6%)     | 106<br>(20.4%)    | 41<br>(36.3%)     |             |
| Rural                       | 67<br>(9.3%)    | 7 (8.2%)          | 38<br>(7.2%)      | 22<br>(19.9%)     |             |

|                                               |                |               |                |               |        |
|-----------------------------------------------|----------------|---------------|----------------|---------------|--------|
| Employment status                             |                |               |                |               | 0.004  |
| Employed                                      | 501<br>(69.3%) | 48<br>(52.7%) | 380<br>(73.2%) | 73<br>(64.9%) |        |
| Self-employed                                 | 99<br>(13.7%)  | 1 (1.2%)      | 74<br>(14.2%)  | 24<br>(21.3%) |        |
| On sick leave                                 | 1 (0%)         | 0             | 0              | 0             |        |
| Unemployed                                    | 56<br>(7.7%)   | 13<br>(14.3%) | 37<br>(7.1%)   | 6 (5.3%)      |        |
| Retired                                       | 8<br>(1.1.7%)  | 0             | 4 (1.0%)       | 5 (4.1%)      |        |
| Student/Pupil                                 | 38<br>(5.2%)   | 27<br>(29.7%) | 10<br>(2.0%)   | 0             |        |
| Other                                         | 20<br>(2.8%)   | 2 (2.1%)      | 13<br>(2.5%)   | 5 (4.5%)      |        |
| Education level                               |                |               |                |               | 0.0027 |
| Undergraduate                                 | 366<br>(50.6%) | 67<br>(73.7%) | 233<br>(44.9%) | 65<br>(58.3%) |        |
| Graduate                                      | 348<br>(48.1%) | 24<br>(25.8%) | 280<br>(53.9%) | 45<br>(39.7%) |        |
| Other                                         | 9 (1.2%)       | 0             | 6 (1.2%)       | 2 (2.0%)      |        |
| Clinical information                          |                |               |                |               |        |
| Fitzpatrick scale                             |                |               |                |               | 0.278  |
| Light, pale white skin (Fitzpatrick I)        | 32<br>(4.4%)   | 3 (3.6%)      | 18<br>(3.4%)   | 10<br>(9.4%)  |        |
| White, fair skin (Fitzpatrick II)             | 101<br>(14.0%) | 7 (8.1%)      | 74<br>(14.2%)  | 20<br>(18.1%) |        |
| Medium, white to olive skin (Fitzpatrick III) | 198<br>(27.4%) | 29<br>(31.8%) | 136<br>(26.2%) | 33<br>(29.2%) |        |

|                                                                                                                                           |                |                 |                 |                 |       |
|-------------------------------------------------------------------------------------------------------------------------------------------|----------------|-----------------|-----------------|-----------------|-------|
| Brown skin, typical Mediterranean Caucasian skin,<br>or Asian background/Latin, Central, or South<br>American background (Fitzpatrick IV) | 187<br>(25.8%) | 18<br>(20.0%)   | 135<br>(26.0%)  | 34<br>(30.0%)   |       |
| Dark brown skin; Mid-eastern skin types<br>(Fitzpatrick V)                                                                                | 170<br>(23.5%) | 26<br>(28.8%)   | 131<br>(25.1%)  | 13<br>(11.6%)   |       |
| Black, very dark brown to black/Black skin<br>(Fitzpatrick VI)                                                                            | 35<br>(4.9%)   | 7 (7.8%)        | 26<br>(5.0%)    | 2 (1.7%)        |       |
| Family history of acne scars, Yes, n (%)                                                                                                  | 481<br>(66.6%) | 64<br>(69.7%)   | 345<br>(66.4%)  | 72<br>(64.5%)   | 0.734 |
| Age at facial acne onset (year), mean (SEM)                                                                                               | 14.2<br>(0.24) | 13.02<br>(0.51) | 14.35<br>(0.26) | 14.58<br>(0.66) | 0.277 |
| Facial acne duration (year), mean (SEM)                                                                                                   | 10 (0.32)      | 5.47<br>(0.45)  | 9.99<br>(0.23)  | 14.01<br>(0.91) |       |
| Ever treated for facial acne, Yes, n (%)                                                                                                  | 516<br>(71.3%) | 64<br>(69.7%)   | 377<br>(72.6%)  | 75<br>(66.9%)   | 0.373 |
| Facial acne treatment delay (year), mean (SEM)                                                                                            | 2.33<br>(0.18) | 2.76<br>(0.46)  | 2.35<br>(0.13)  | 1.84<br>(0.25)  | 0.106 |
| Current facial acne scar severity, n (%)                                                                                                  |                |                 |                 |                 | 0.105 |
| Mild                                                                                                                                      | 228<br>(31.6%) | 32<br>(35.3%)   | 169<br>(32.5%)  | 27<br>(24.0%)   |       |
| Moderate                                                                                                                                  | 359<br>(49.6%) | 47<br>(51.8%)   | 262<br>(50.4%)  | 50<br>(44.2%)   |       |
| Severe/very severe                                                                                                                        | 136<br>(18.8%) | 12<br>(12.9%)   | 89<br>(17.1%)   | 36<br>(31.8%)   |       |
| Type of atrophic scars, n (%)                                                                                                             |                |                 |                 |                 |       |
| Ice pick scars                                                                                                                            | 599<br>(82.8%) | 85<br>(92.8%)   | 439<br>(84.6%)  | 75<br>(66.4%)   | 0.064 |
| Boxcar scars                                                                                                                              | 162<br>(22.4%) | 8 (8.9%)        | 109<br>(21.0%)  | 45<br>(39.8%)   | 0.042 |

|                                                          |                 |                 |                 |                 |        |
|----------------------------------------------------------|-----------------|-----------------|-----------------|-----------------|--------|
| Rolling scars                                            | 53<br>(7.4%)    | 3 (3.8%)        | 36<br>(6.9%)    | 14<br>(12.8%)   | 0.044  |
| Duration of facial acne scars (year), mean (SEM)         | 15.66<br>(0.35) | 4.69<br>(0.12)  | 14.74<br>(0.47) | 31.16<br>(0.44) | 0.0001 |
| Age at the onset of facial acne scars (year), mean (SEM) | 19.07<br>(0.45) | 16.99<br>(0.41) | 19.40<br>(0.53) | 19.23<br>(0.66) | 0.0001 |
| Acne scar treatment received, Yes, n (%)                 | 226<br>(31.2%)  | 29<br>(31.6%)   | 180<br>(34.6%)  | 17<br>(15.2%)   | 0.006  |
| Acne scar treatment delay, year, mean (SEM)              | 2.00<br>(0.26)  | 0.65<br>(0.08)  | 2.05<br>(0.16)  | 3.37<br>(1.91)  | 0.151  |

\*P value for comparison across age groups

**Supplementary Table 2** Odds ratios for a score in the range of ‘very large’ impact of facial acne scars on HRQOL (per DLQI) in crude and adjusted logistic regression models, with age, sex, residential background and country of residence, acne scar severity grade, type of skin, education, and employment status as explanatory variables

| Explanatory variables             | Crude OR | Crude 95% CI | Crude P value | Adjusted OR | Adjusted 95% CI | Adjusted P value |
|-----------------------------------|----------|--------------|---------------|-------------|-----------------|------------------|
| <b>Sex</b>                        |          |              |               |             |                 |                  |
| Male                              | ref      |              |               | ref         |                 |                  |
| Female                            | 0.90     | 0.67 to 1.20 | 0.383         | 0.86        | 0.66 to 1.10    | 0.174            |
| <b>Age group (year)</b>           |          |              |               |             |                 |                  |
| 18-24                             | ref      |              |               | ref         |                 |                  |
| 25-45                             | 0.80     | 0.37 to 1.72 | 0.493         | 0.51        | 0.19 to 1.36    | 0.138            |
| 46-55                             | 0.35     | 0.19 to 0.62 | 0.006         | 0.20        | 0.13 to 0.30    | 0.0001           |
| <b>Type of residence</b>          |          |              |               |             |                 |                  |
| Urban                             | ref      |              |               | ref         |                 |                  |
| Suburban                          | 0.54     | 0.44 to 0.65 | 0.0001        | 0.59        | 0.33 to 1.04    | 0.062            |
| Rural                             | 0.63     | 0.29 to 1.41 | 0.205         | 0.75        | 0.23 to 2.43    | 0.563            |
| <b>Work situation</b>             |          |              |               |             |                 |                  |
| Active                            | ref      |              |               | ref         |                 |                  |
| Inactive                          | 0.34     | 0.16 to 0.72 | 0.014         | 0.31        | 0.10 to 0.91    | 0.039            |
| <b>Education</b>                  |          |              |               |             |                 |                  |
| Undergraduate                     | ref      |              |               | ref         |                 |                  |
| Graduate                          | 1.40     | 1.01 to 1.93 | 0.045         | 1.30        | 1.08 to 1.57    | 0.016            |
| <b>Fitzpatrick scale</b>          |          |              |               |             |                 |                  |
| Type I – Light, pale white &      | ref      | ref          |               | ref         |                 |                  |
| Type II – White, fair             |          |              |               |             |                 |                  |
| Type III – Medium, white to olive | 1.41     | 0.61 to 3.23 | 0.336         | 1.34        | 0.61 to 2.94    | 0.387            |

|                                           |      |              |        |      |              |        |
|-------------------------------------------|------|--------------|--------|------|--------------|--------|
| Type IV – Olive, moderate brown           | 0.97 | 0.32 to 2.95 | 0.947  | 0.83 | 0.38 to 1.84 | 0.576  |
| Type V – Brown, dark brown                | 1.60 | 1.07 to 2.37 | 0.029  | 1.38 | 1.03 to 1.84 | 0.035  |
| Type VI – Black, very dark brown to black | 3.73 | 2.54 to 5.47 | 0.0001 | 2.76 | 1.71 to 4.45 | 0.003  |
| Acne scar severity                        |      |              |        |      |              |        |
| Mild                                      | ref  |              |        | ref  |              |        |
| Moderate                                  | 1.05 | 0.78 to 1.42 | 0.688  | 1.10 | 0.87 to 1.38 | 0.346  |
| Severe/very severe                        | 2.15 | 1.63 to 2.84 | 0.001  | 2.59 | 2.00 to 3.36 | 0.0001 |

\*Country of residence was also included in the adjusted analyses.

**Supplementary Fig 1** Mean DLQI scores for each questionnaire item (Q1-Q10). Mean DLQI scores based on age groups (a) and sex (b).

(a) Each question is scored from a minimum of 0 (i.e., no impact on HRQOL) to a maximum of 3 (i.e., very strong impact on HRQOL); Q: DLQI questionnaire item number; P values for the comparison of DLQI scores across age groups for a adjusted analyses including a age, sex, residential background and country of residence, a acne scar severity grade, type of skin, education, and employment status are as follows: Q1=0.001; Q2=0.007; Q3=0.008; Q4=0.011; Q5=0.002; Q6=0.419; Q7=0.001; Q8=0.006; Q9=0.097; Q10=0.014.

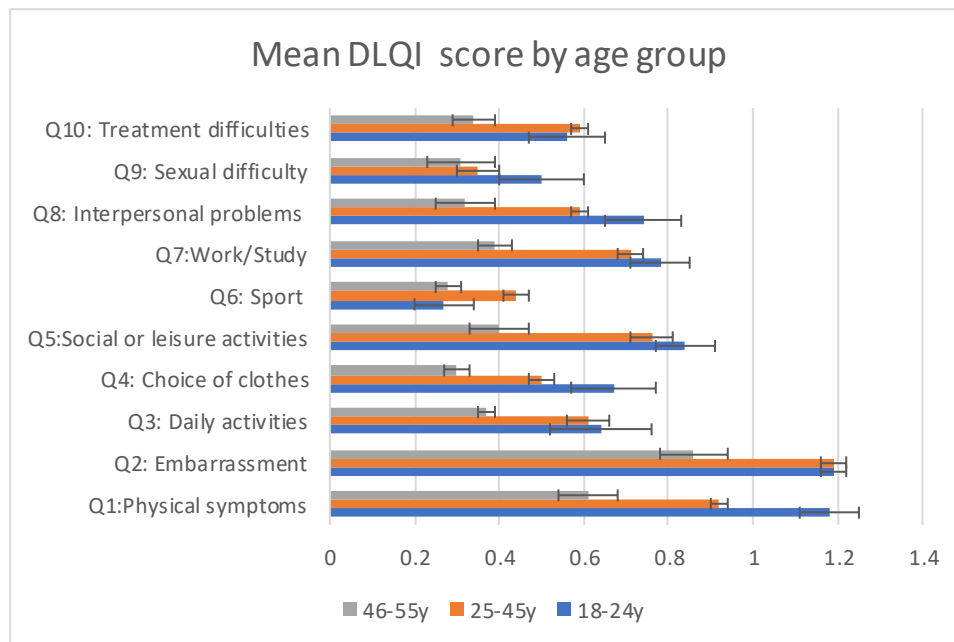

(b) Each question is scored from a minimum of 0 (i.e., no impact on HRQOL) to a maximum of 3 (i.e., very strong impact on HRQOL); Q: DLQI questionnaire item number; P values for the DLQI score comparison between male and female subjects for a adjusted analyses including a age, sex, residential background and country of residence, a acne scar severity grade, type of skin, education, and employment status are as follows: Q1=0.002; Q2=0.004; Q3=0.284; Q4=0.141; Q5=0.441; Q6=0.177; Q7=0.532; Q8=0.075; Q9=0.143; Q10=0.383.



### Mean DLQI score by gender

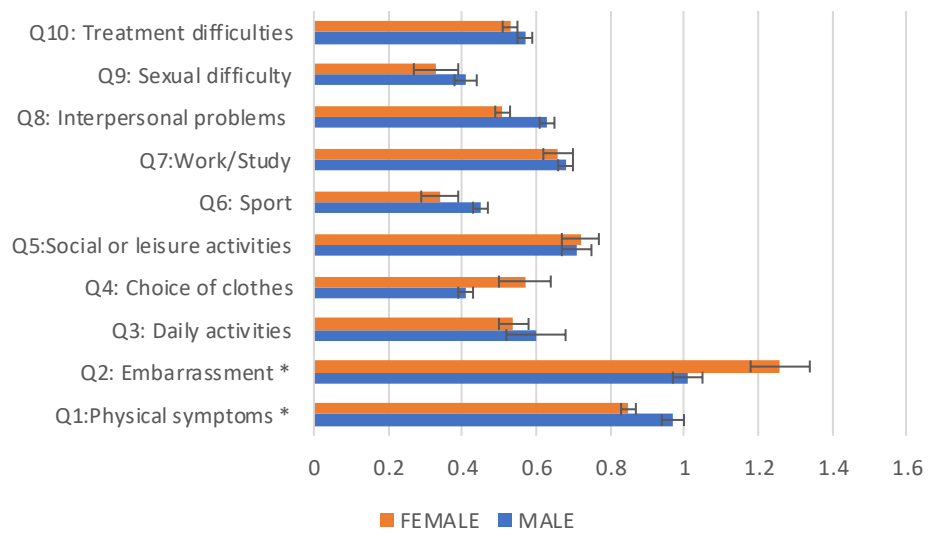

Supplement: MOESM2 [file 19803560]
